# Supplementary material for: Widespread exposure to SARS-CoV-2 in wildlife communities
Source: PubMed Central journal article supplement (PMC11286844; doi:10.1038/s41467-024-49891-w), 2024-07-29
Supplement: 41467_2024_49891_MOESM3_ESM.pdf [file 41467_2024_49891_MOESM3_ESM.pdf]

## Description of Additional Supplementary Files

File Name: Supplementary Data 1

Description: Average RT-qPCR values for all samples in Virginia and Washington DC from June 2022 through September 2023. Samples were collected either in the field (Study) or by a Virginia wildlife rehabilitation center (Blue Ridge Wildlife Center (BRWC), The Wildlife Center of Virginia (TWCV), or Southwest Virginia Wildlife Center of Roanoke (SWVAWC)). See attached excel file.

File Name: Supplementary Data 2

Description: Serology results from the 49 samples collected after SARS-CoV-2 arrival (post) and 67 samples prior to SARS-CoV-2 arrival (pre) samples collected. All 'pre' *Peromyscus* species were provided by NEON<sup>1</sup>, the Eastwood lab at Virginia Tech, or the Kilpatrick lab at UC Santa Cruz<sup>2</sup>. All counties are located in Virginia unless otherwise noted. See attached excel file.

File Name: Supplementary Data 3

Description: Housekeeping primer sequences for RT-qPCR testing in 22 wildlife species for presence of SARS-CoV-2. See attached excel file.

File Name: Supplementary Data 4

Description: Cross-reference tables for the eight phylogenetic trees (Fig 3 & Supplementary Figures 2-9). See attached.
